# Supplementary figures and images for: Large Language Models as Mediators: Addressing Rater Disagreement in Turkish Essay Scoring
Source: Research Square preprint supplement (doi:10.21203/rs.3.rs-7226688/v1), 2025-08-04

# Appendices

Figure S1. Distributions for score differences and score overlap


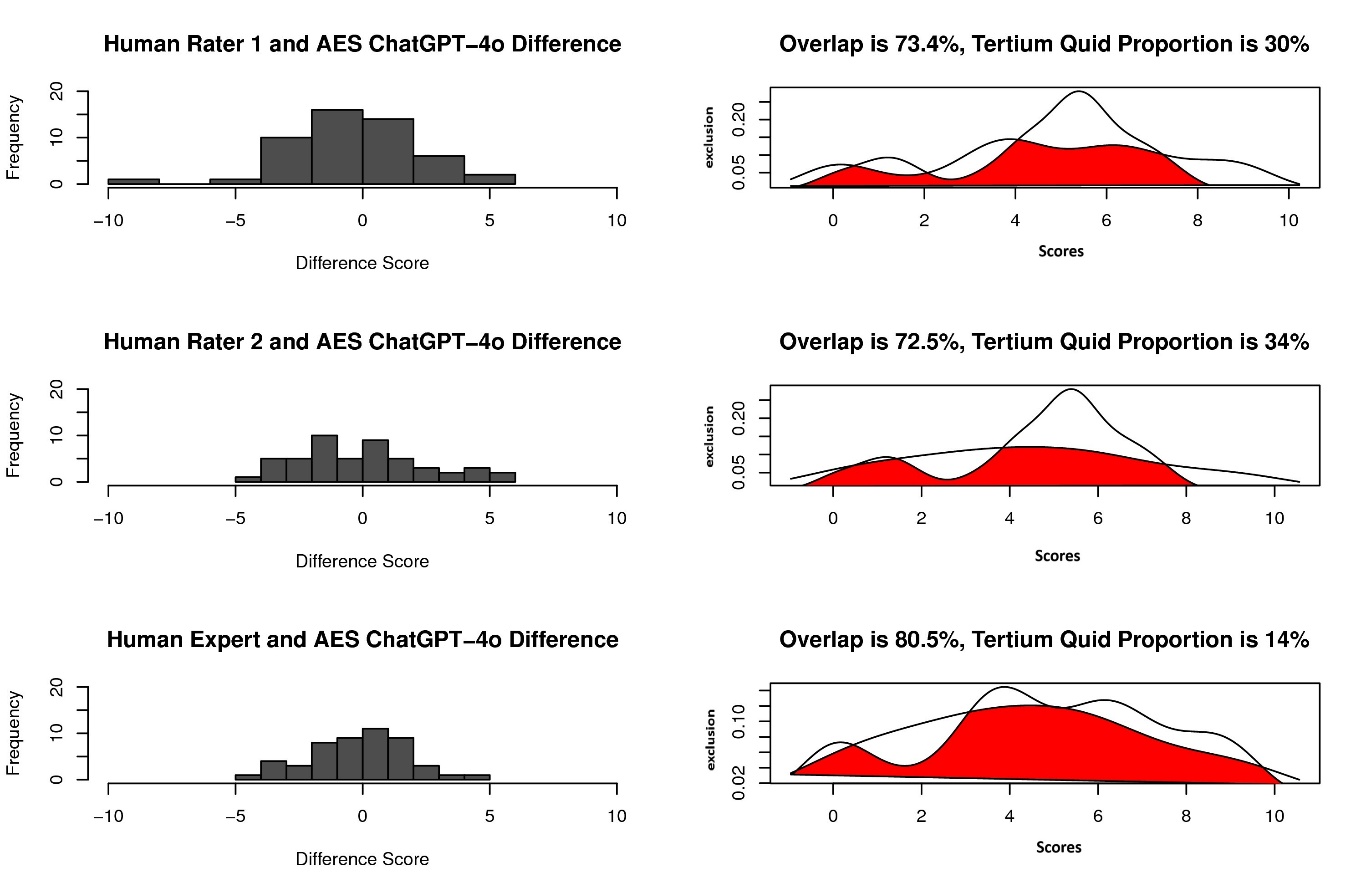

Supplement: Supplementary file 1 [file 3ab94ae719dbb01e912665b0.docx]
